# Supplementary material
Source: HighWire-hosted journal article supplement (https://erj.ersjournals.com/content/55/5/2000473)
Supplement: inline-supplementary-material-1 [file inline-supplementary-material-1.pdf]

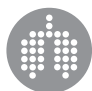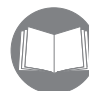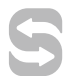

SHAREABLE PDF

# The search for the “healthy” blood eosinophil count

Signe Vedel-Krogh<sup>1,2,3</sup>

**Affiliations:** <sup>1</sup>Dept of Clinical Biochemistry, Herlev and Gentofte Hospital, Copenhagen University Hospital, Copenhagen, Denmark. <sup>2</sup>The Copenhagen General Population Study, Herlev and Gentofte Hospital, Copenhagen University Hospital, Copenhagen, Denmark. <sup>3</sup>Dept of Clinical Biochemistry, Rigshospitalet, Copenhagen University Hospital, Copenhagen, Denmark.

**Correspondence:** Signe Vedel-Krogh, Rigshospitalet, Dept of Clinical Biochemistry, Blegdamsvej 9, Copenhagen 2100, Denmark. E-mail: [signe.vedel.krogh.01@regionh.dk](mailto:signe.vedel.krogh.01@regionh.dk)

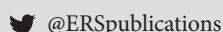

@ERSpublications

**Characteristics other than allergy are associated with higher blood eosinophil counts in the general population and the healthy range in eosinophils might be lower than what we currently perceive as normal** <http://bit.ly/2WgSKEP>

**Cite this article as:** Vedel-Krogh S. The search for the “healthy” blood eosinophil count. *Eur Respir J* 2020; 55: 2000473 [<https://doi.org/10.1183/13993003.00473-2020>].

This single-page version can be shared freely online.

Although traditionally associated with allergy and parasitic infections, eosinophils are pleiotropic cells. They function as modulators of innate and adaptive immunity and are implicated in the pathogenesis of several local and systemic inflammatory processes, tissue injury and tumour immunity [1]. In the respiratory tract, eosinophils are specifically associated with the development of allergic asthma and are recruited to the lungs by cytokines released by activated Th2 cells as part of the inflammatory response [2]. COPD is classically regarded as a Th1-mediated disease dominated by neutrophil cells; however, a subset of COPD shows evidence of eosinophilic airway inflammation [3]. In observational studies, high blood eosinophil counts are associated with higher risk of asthma and COPD exacerbations [4, 5], and both the Global Initiative for Asthma [6] and the Global Strategy for the Diagnosis, Management and Prevention of COPD [7] recognise the use of blood eosinophil counts to guide therapy in asthma and COPD.
